# Supplementary figures and images for: Impact of Elevated Brain IL-6 in Transgenic Mice on the Behavioral and Neurochemical Consequences of Chronic Alcohol Exposure
Source: MDPI journal article supplement (doi:10.3390/cells12182306), 2023-09-19

Figure S1

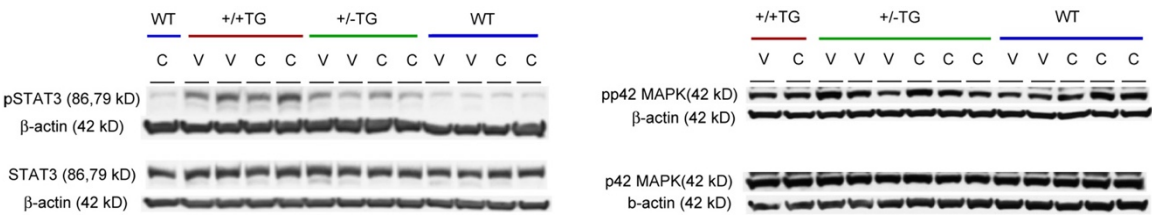

Figure S2

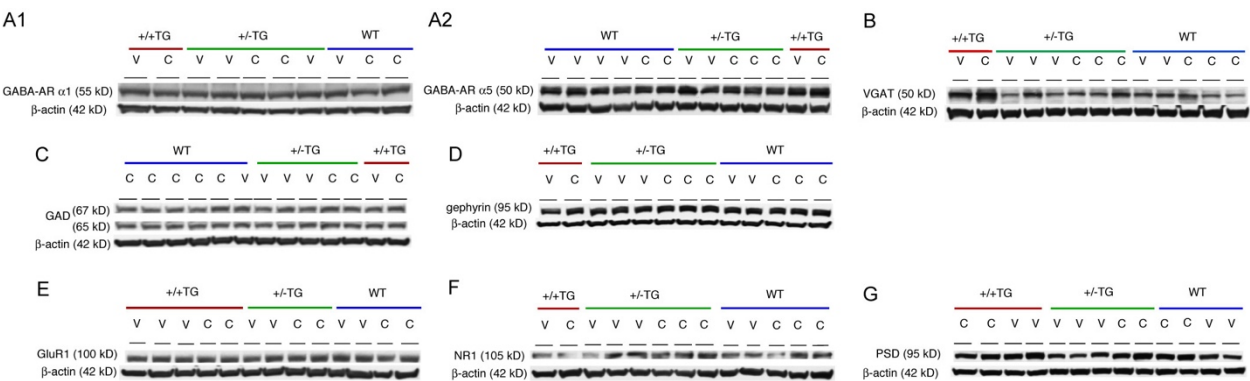

Supplement: s1 [file s1]
